# Supplementary material
Source: HighWire-hosted journal article supplement (http://www.cmaj.ca/highwire/filestream/57664/field_highwire_adjunct_files/1/predict-van-2-at.pdf)

**Appendix 2 (as submitted by the authors):** Independent association of continuous variables with time to death. This figure presents the association of time to death (vertical axis) with patient age (top left), serum albumin (top right), year of first renal replacement service (bottom left), and months from first renal replacement service to transplant listing (bottom right). In each plot, the associations for patients with no transplant (black line), deceased donor transplant (red line), and living donor transplant (blue line) are presented. In each plot, the left-most value on the horizontal axis is the reference group for the hazard ratio. For albumin (top right), associations for all 3 groups are the same and the curves are superimposed on each other. For year of first renal replacement service (bottom left) and months from first renal replacement service to transplant listing (bottom right), the associations for no transplantation and living donor transplantation are the same and the curves are superimposed on each other.

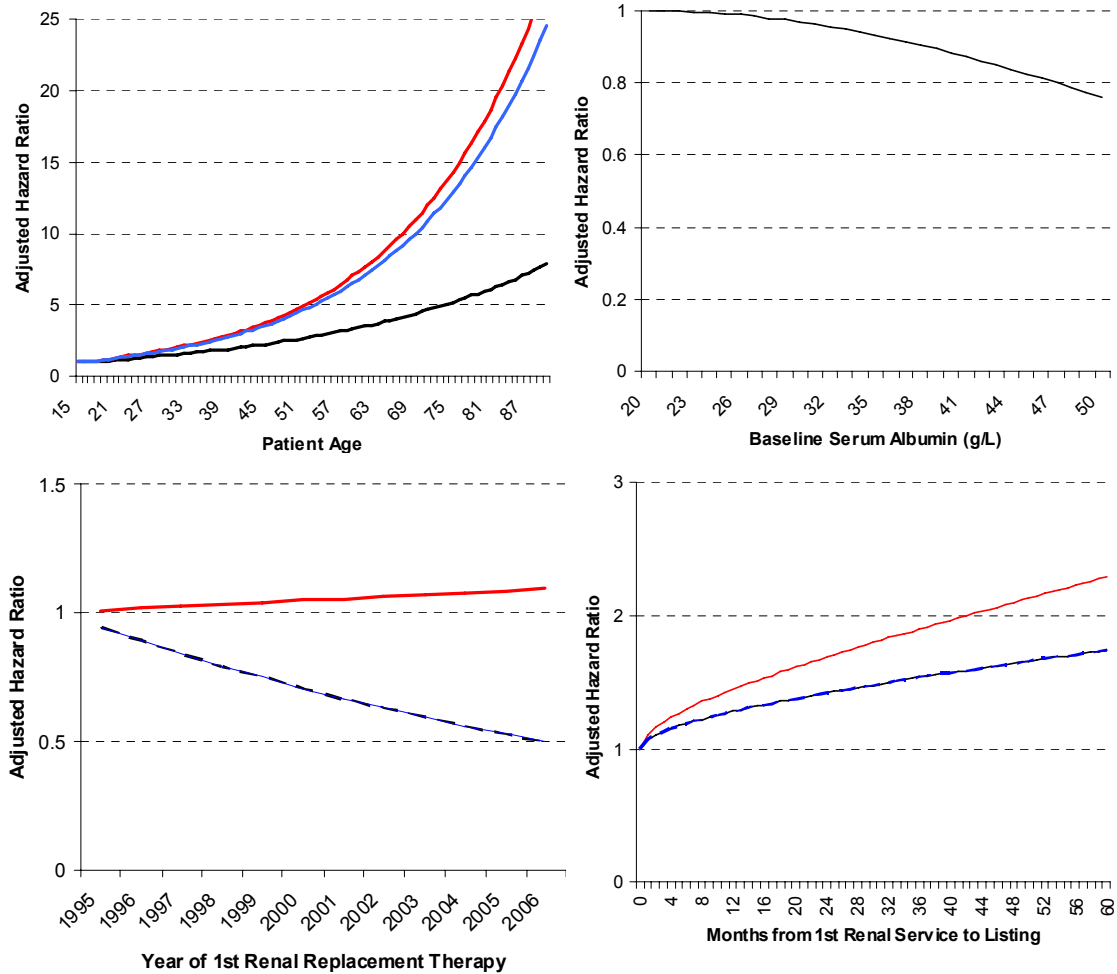

Supplement: predict-van-2-at.pdf [file predict-van-2-at.pdf]
